# Supplementary material
Source: PubMed Central journal article supplement (PMC3900112)
Supplement: supp_ddt504_ddt504supp.pdf [file supp_ddt504_ddt504supp.pdf]

## SUPPLEMENTAL DATA

### **Genome-wide alteration of 5-hydroxymethylcytosine in a mouse model of fragile X-associated tremor/ataxia syndrome**

By

Bing Yao<sup>1</sup>, Li Lin<sup>1</sup>, R. Craig Street<sup>1</sup>, Zachary A. Zalewski<sup>2</sup>, Jocelyn N. Galloway<sup>2</sup>, David L. Nelson<sup>2</sup> and Peng Jin<sup>1, \*</sup>

<sup>1</sup>Department of Human Genetics, Emory University School of Medicine, Atlanta, GA 30322, USA; <sup>2</sup>Department of Human and Molecular Genetics, Baylor College of Medicine, One Baylor Plaza, Houston, TX 77030, USA.

\*To whom correspondence should be addressed: [peng.jin@emory.edu](mailto:peng.jin@emory.edu)

**Supplementary Figure 1. Chromosome-wide 5hmC densities in wild-type and rCGG mice cerebella.** Chromosome-wide densities were determined as reads per chromosome divided by the total number of reads in millions. Expected values were determined by dividing  $10^6$  by the total genome length and multiplying by chromosome length.

**Supplementary Figure 2. Differential 5hmC distribution on various CpG density promoters. (A-C)** Normalized 5hmC read densities on promoters with differential CGI abundance. Wild-type and rCGG 5hmC were separately plotted **(A-B)** or combined together **(C)**.

**Supplementary Figure 3. Mouse phenotype predictions for defined DhMRs. (A-B)** Identified DhMRs were predicted for associated mouse genotypes using the GREAT tool.

**Supplementary Table 1.** Sequencing information for each biological replicate and combined samples.

**Supplementary Table 2-3.** Wild-type- or rCGG-specific DhMRs identified by MACS.

**Supplementary Table 4-5.** Wild-type- or rCGG-specific DhMRs annotation results by HOMER.

Supplementary Fig.1

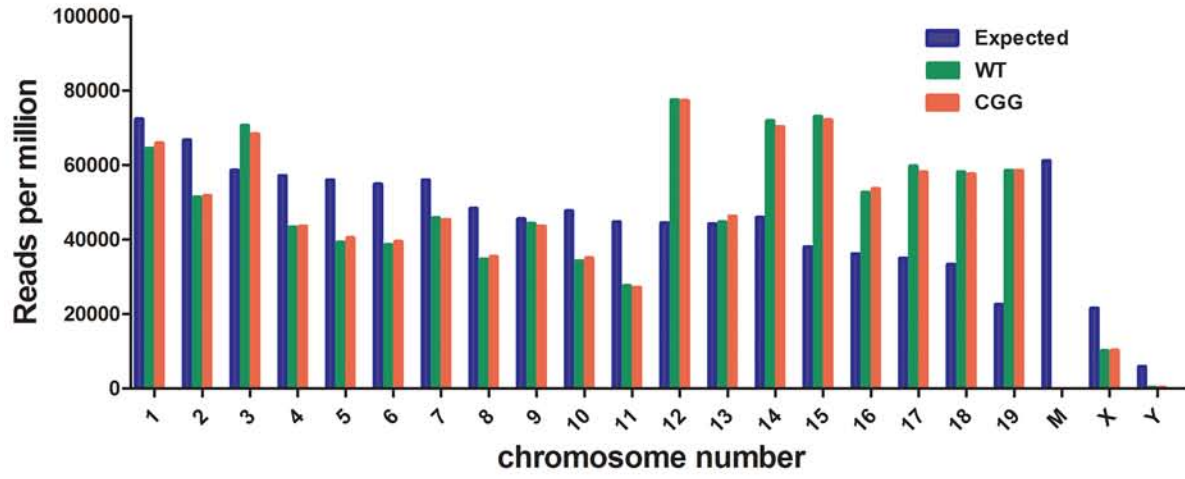

# Supplementary Fig.2

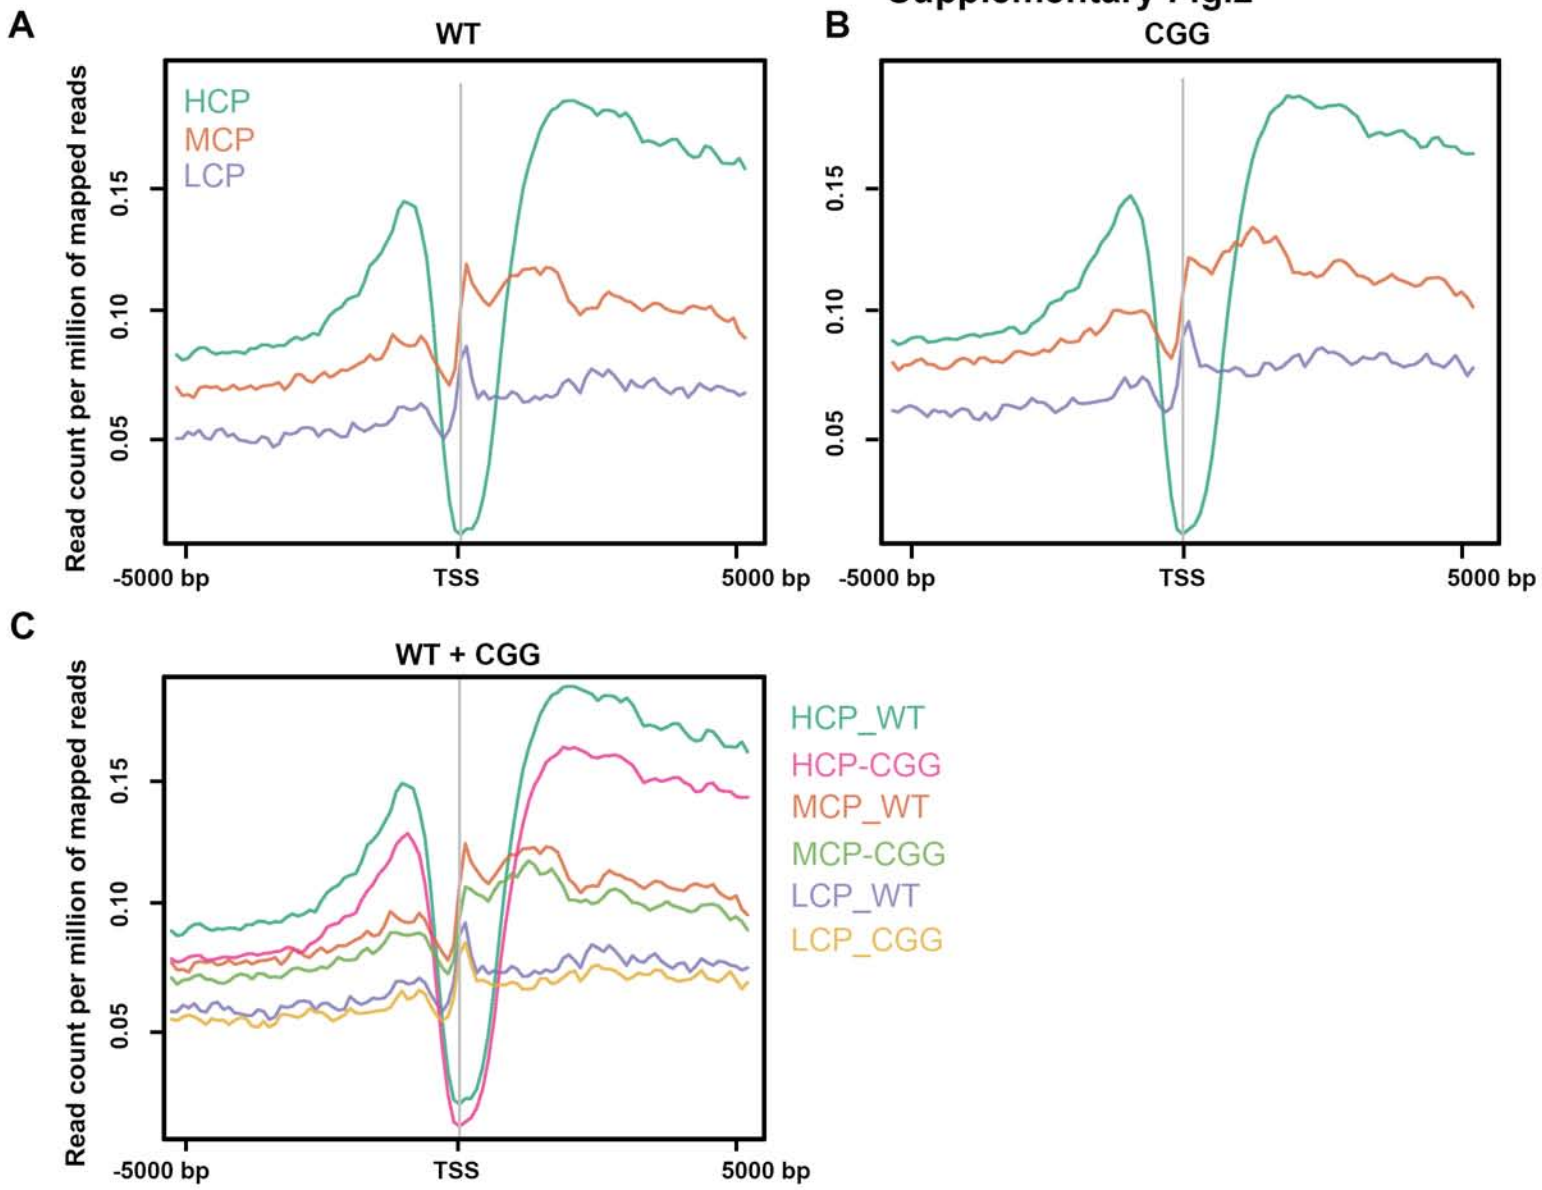

**A**

**Wildtype DhMRs GO analysis (8658 DhMR regions)**

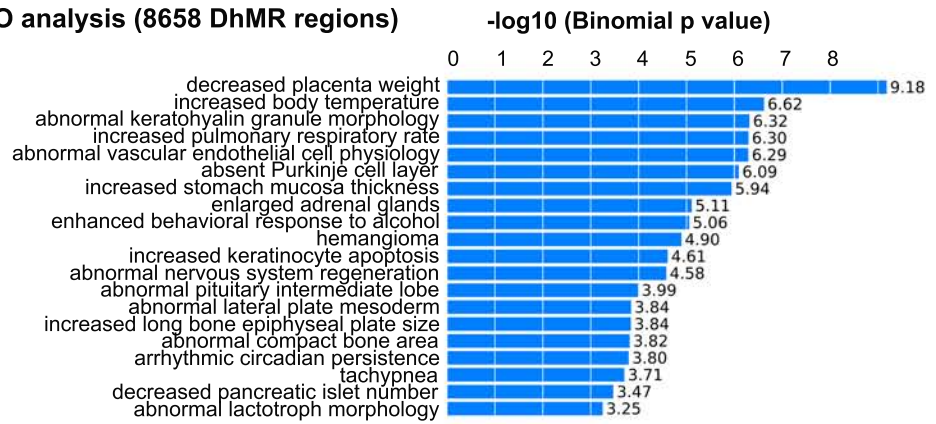

**B**

**CGG DhMRs GO analysis (4311 DhMR regions)**

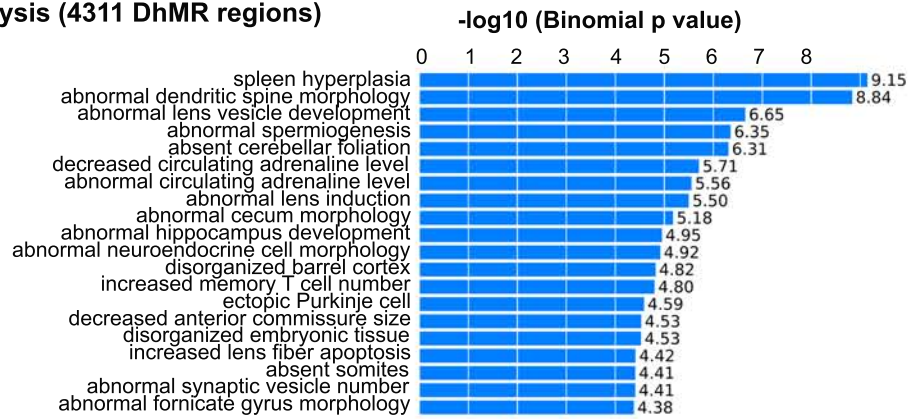

**Supplementary Table 1**

| replicates | Monoclonal reads | Number of peaks called to input | Number of negative peaks called (enrich in input) |
|------------|------------------|---------------------------------|---------------------------------------------------|
| 16wkWT-1   | 6,568,046        | 80877                           | 207                                               |
| 16wkWT-2   | 4,597,660        | 57118                           | 140                                               |
| 16wkWT-3   | 9,194,192        | 90508                           | 290                                               |
| 16wkCGG-1  | 13,429,874       | 114476                          | 350                                               |
| 16wkCGG-2  | 12,328,423       | 114032                          | 370                                               |
| 16wkCGG-3  | 8,309,064        | 76635                           | 210                                               |

| Combined samples | Monoclonal reads | Number of peaks called to input | DhMRs in WT or CGG |
|------------------|------------------|---------------------------------|--------------------|
| 16wkWT           | 20,359,898       | 95116                           | 8658               |
| 16wkCGG          | 46,744,882       | 77846                           | 4311               |
